# Supplementary material for: Alcohol based vapor annealing of a poly(3,4-ethylenedioxythiophene):poly(styrenesulfonate) layer for performance improvement of inverted perovskite solar cells
Source: Royal Society of Chemistry journal article supplement (doi:10.1039/c8nr02146e), 2018-01-01
Supplement: c8nr02146e1.pdf [file c8nr02146e1.pdf]

---

## Supporting information for

# Alcohol based vapor annealing of poly(3,4-ethylenedioxythiophene):poly(styrenesulfonate) layer for performance improvement of inverted perovskite solar cells

Guanchen Liu,<sup>‡a</sup> Xiaoyin Xie,<sup>‡bc</sup> Zhihai Liu,<sup>\*de</sup> Guanjian Cheng<sup>a</sup> and Eun-Cheol Lee<sup>\*ef</sup>

<sup>a</sup>Department of Material Science and Technology, Jilin Institute of Chemical Technology, Jilin 132022, China

<sup>b</sup>Department of Chemical Technology, Jilin Institute of Chemical Technology, Jilin 132022, China

<sup>c</sup>International Joint Research Laboratory of Nano-Micro Architecture Chemistry, Institute of Theoretical Chemistry, Jilin University, Changchun 130023, China

<sup>d</sup>Department of Bio-Nano Technology, Gachon University, Gyeonggi 461-701, Republic of Korea. E-mail: zhliu@gachon.ac.kr

<sup>e</sup>Gachon Bio-Nano Research Institute, Gyeonggi 461-701, Republic of Korea

<sup>f</sup>Department of Nano-Physics, Gachon University, Gyeonggi 461-701, Republic of Korea. E-mail: elee@gachon.ac.kr

**Table S1.** Summary of photovoltaic parameters of the best sample among PSCs with PEDOT:PSS treated by methanol-based SVA.

| Scan    | $J_{sc}$ (mA cm <sup>-2</sup> ) | $V_{oc}$ (V) | FF (%) | PCE (%) |
|---------|---------------------------------|--------------|--------|---------|
| Forward | 21.9                            | 1.04         | 77.7   | 17.7    |
| Reverse | 21.9                            | 1.05         | 78.1   | 18.0    |

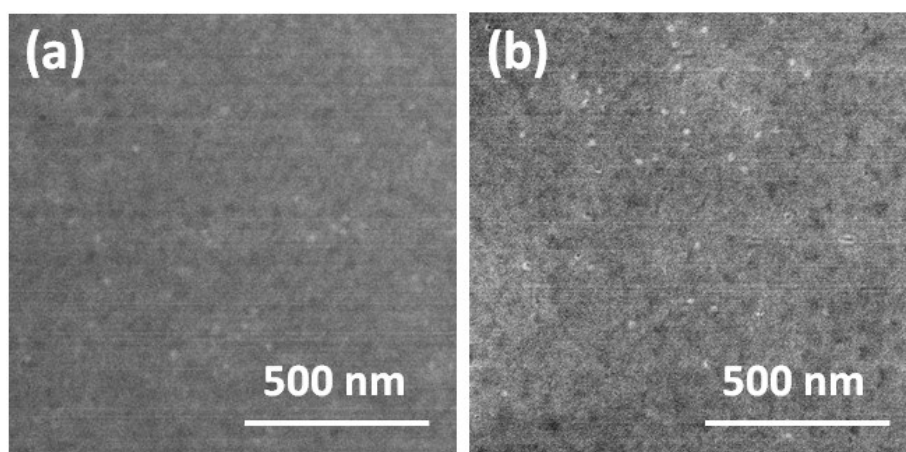

**Fig. S1.** SEM images of PEDOT:PSS without (a) and with (b) methanol-based SVA treatment.

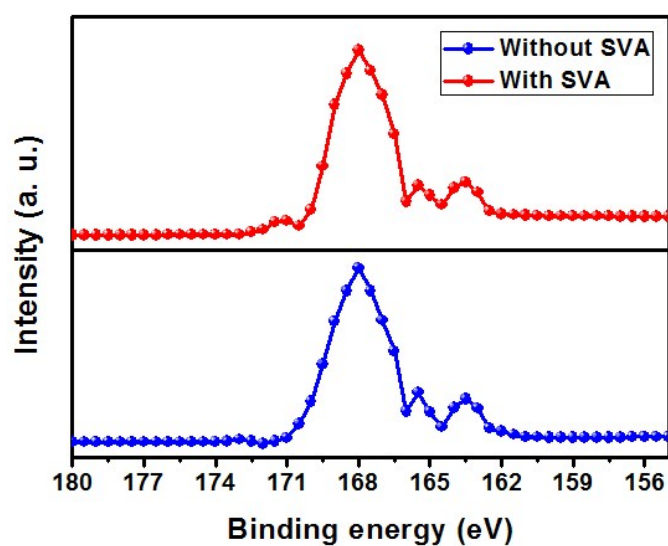

**Fig. S2.** XPS spectra of PEDOT:PSS without (a) and with (b) methanol-based SVA treatment.

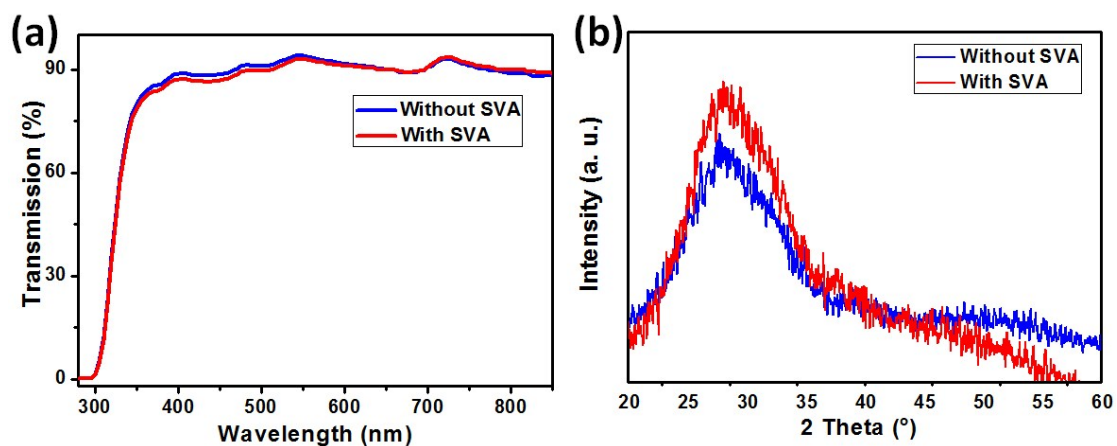

**Fig. S3.** (a) Transmission spectra and (b) XRD patterns of PEDOT:PSS on glass without and with methanol-based SVA treatment.

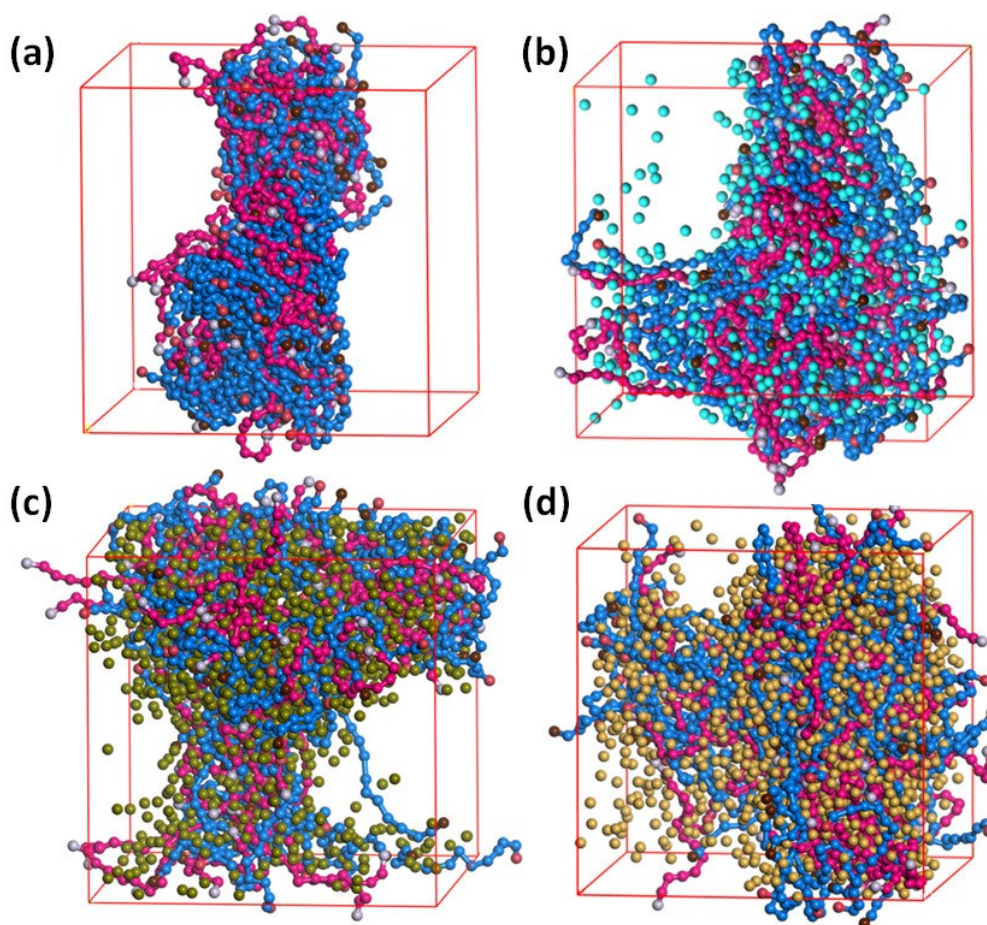

**Fig. S4.** Atomic simulation results of (a) pure PEDOT:PSS and PEDOT:PSS in (b) methanol, (c) ethanol, and (d) isopropanol. Blue and red clusters correspond to PEDOT and PSS, respectively, and the other colored dots stand for the solvent.

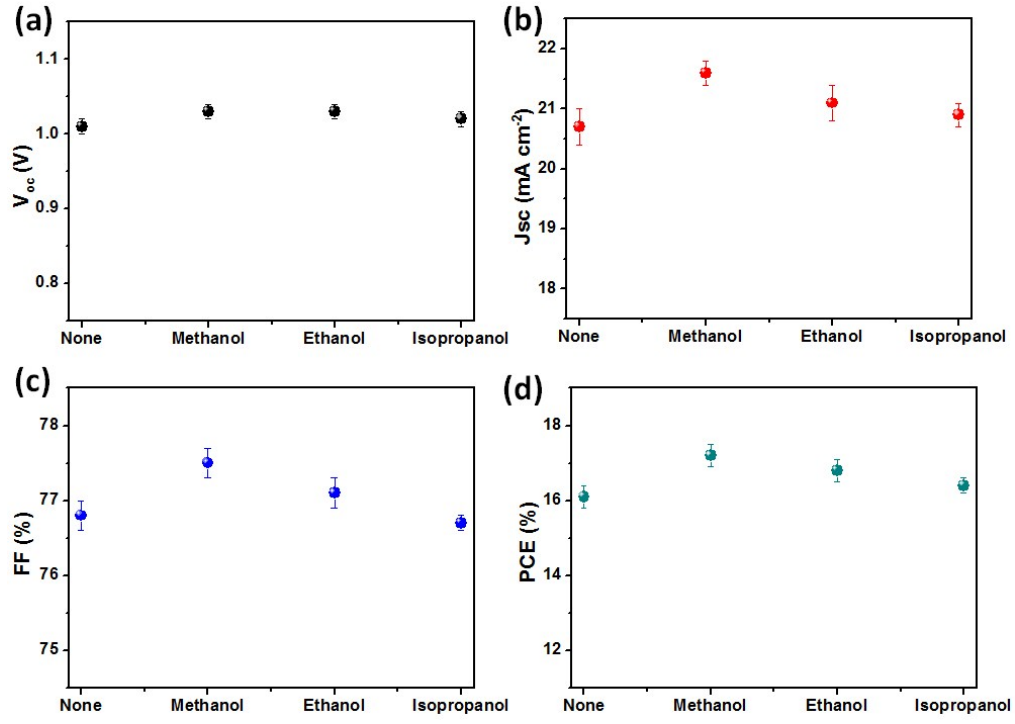

**Fig. S5.** Average values and standard deviations of (a)  $V_{oc}$ , (b)  $J_{sc}$ , (c) FF, and (d) PCE for 20 PSCs.
